# Supplementary material
Source: MDPI journal article supplement (https://www.mdpi.com/2072-4292/10/6/894)

LS08\_GPS

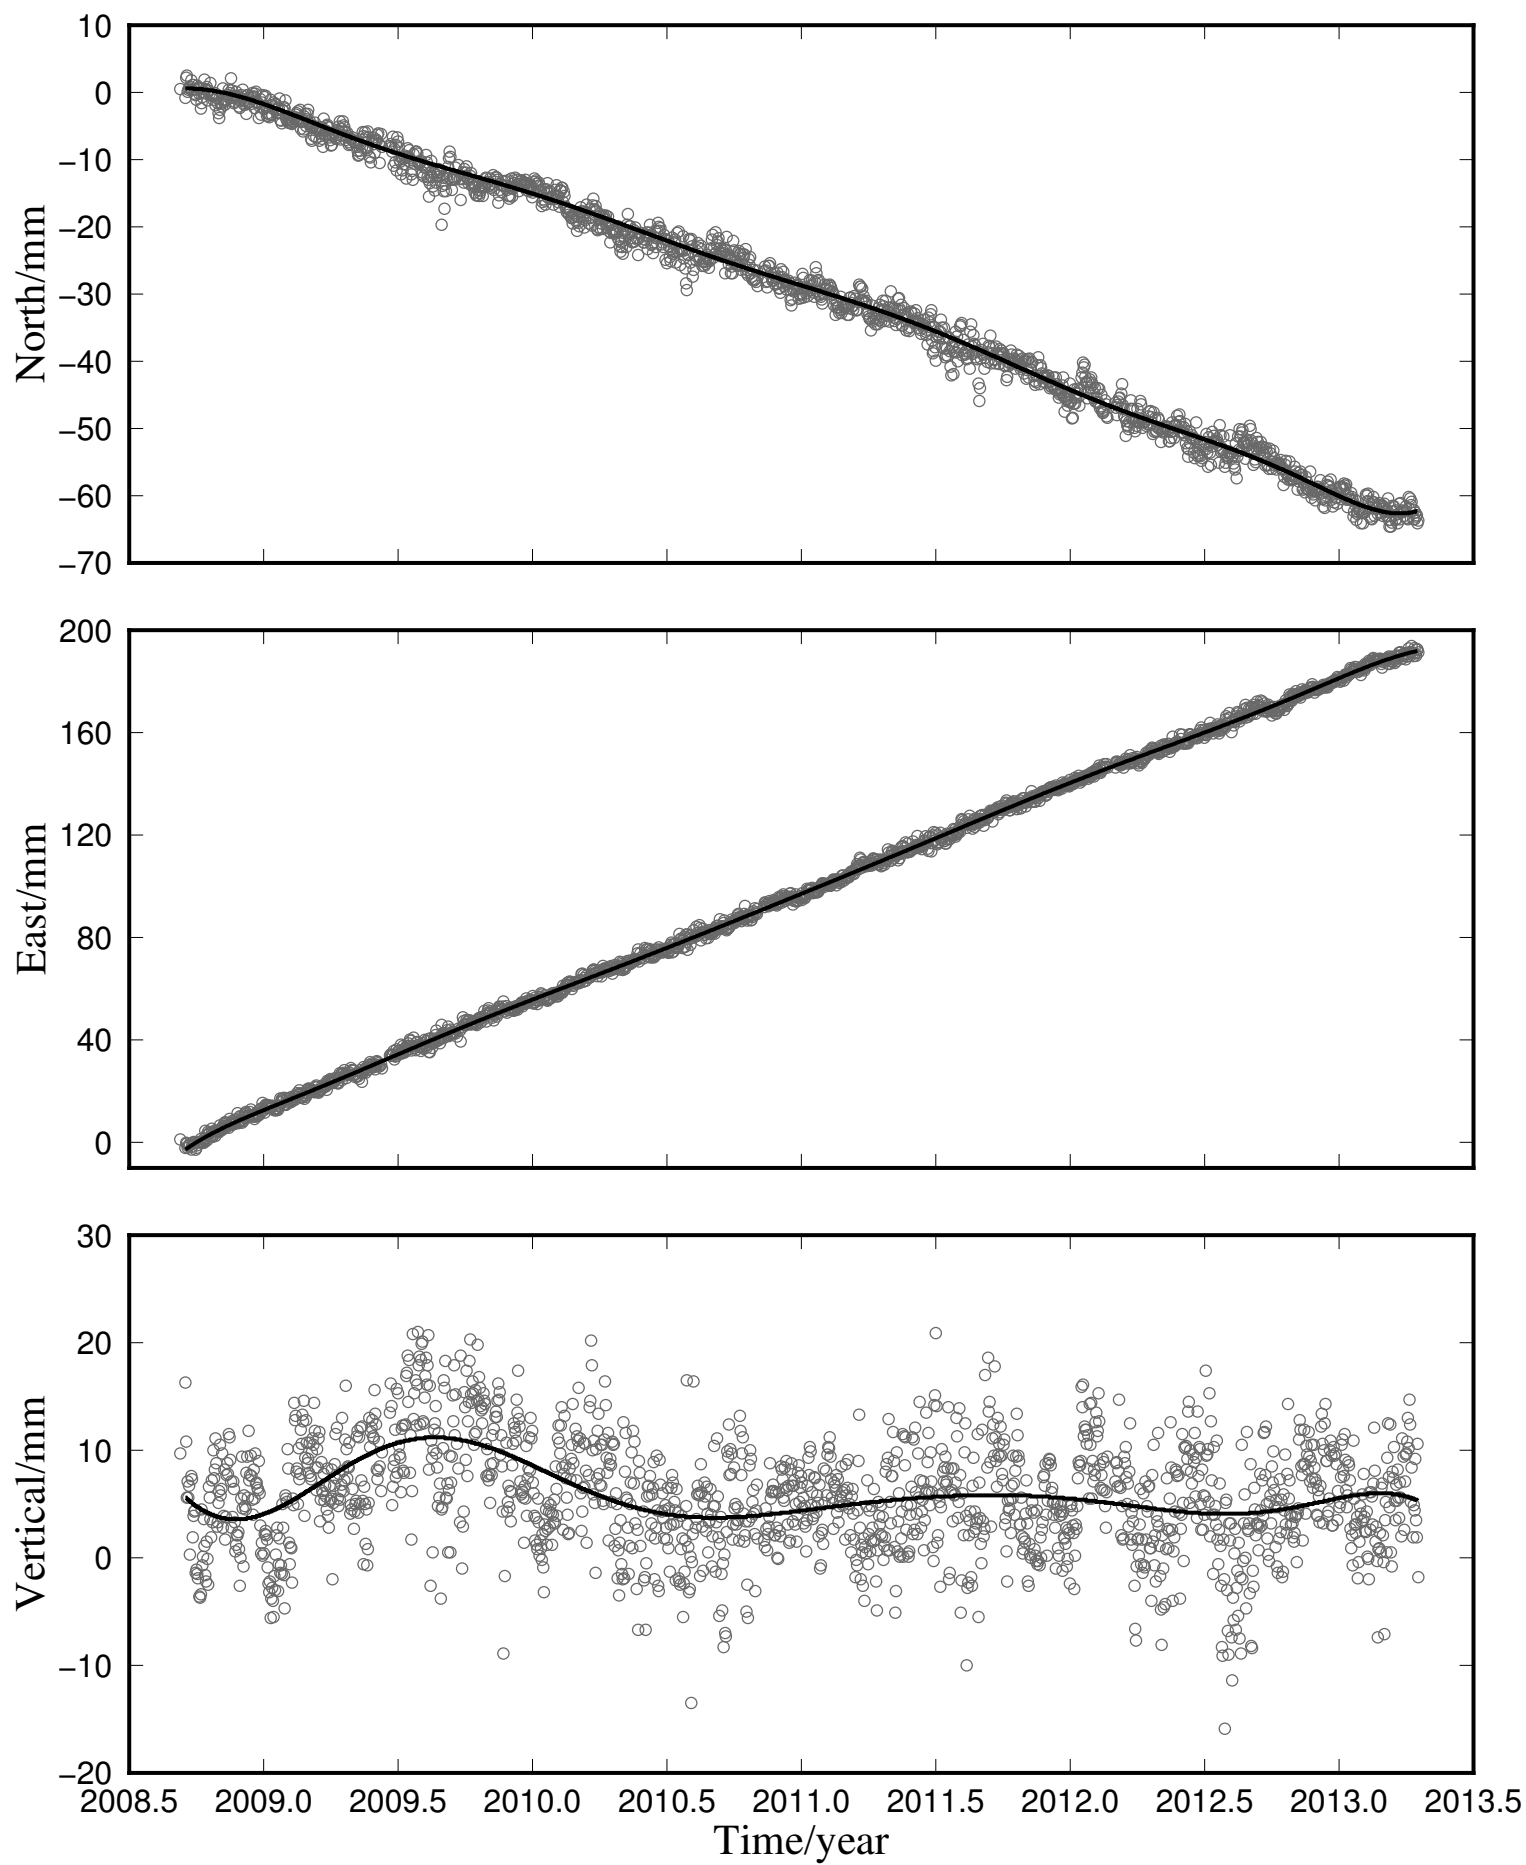

Supplement: s1 [file s1]

LS07\_GPS

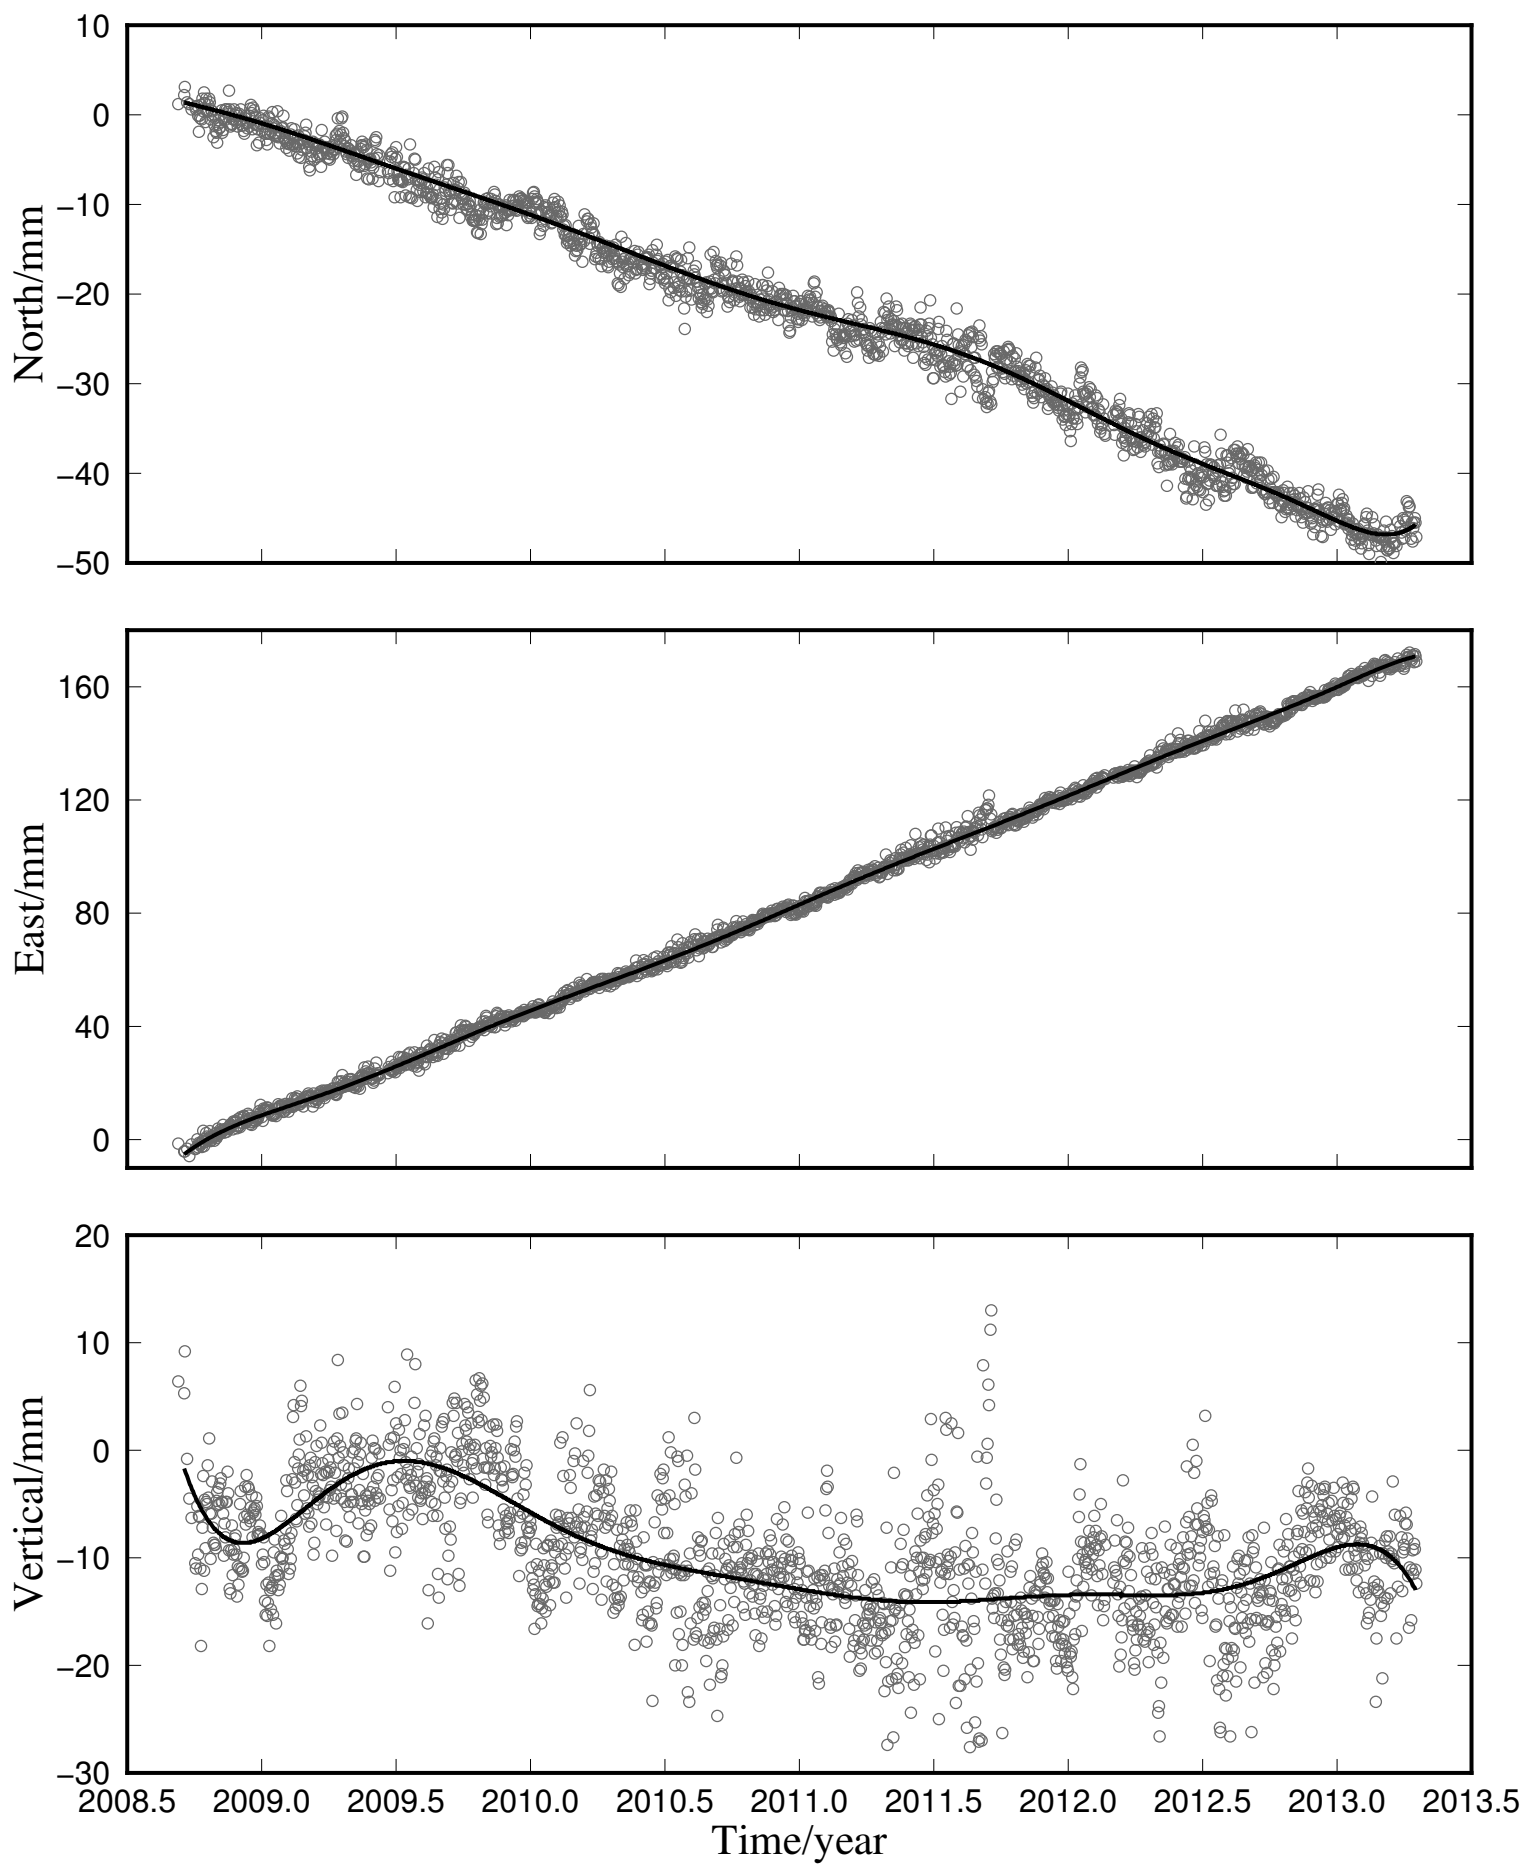

Supplement: s1 [file s1]

LS05\_GPS

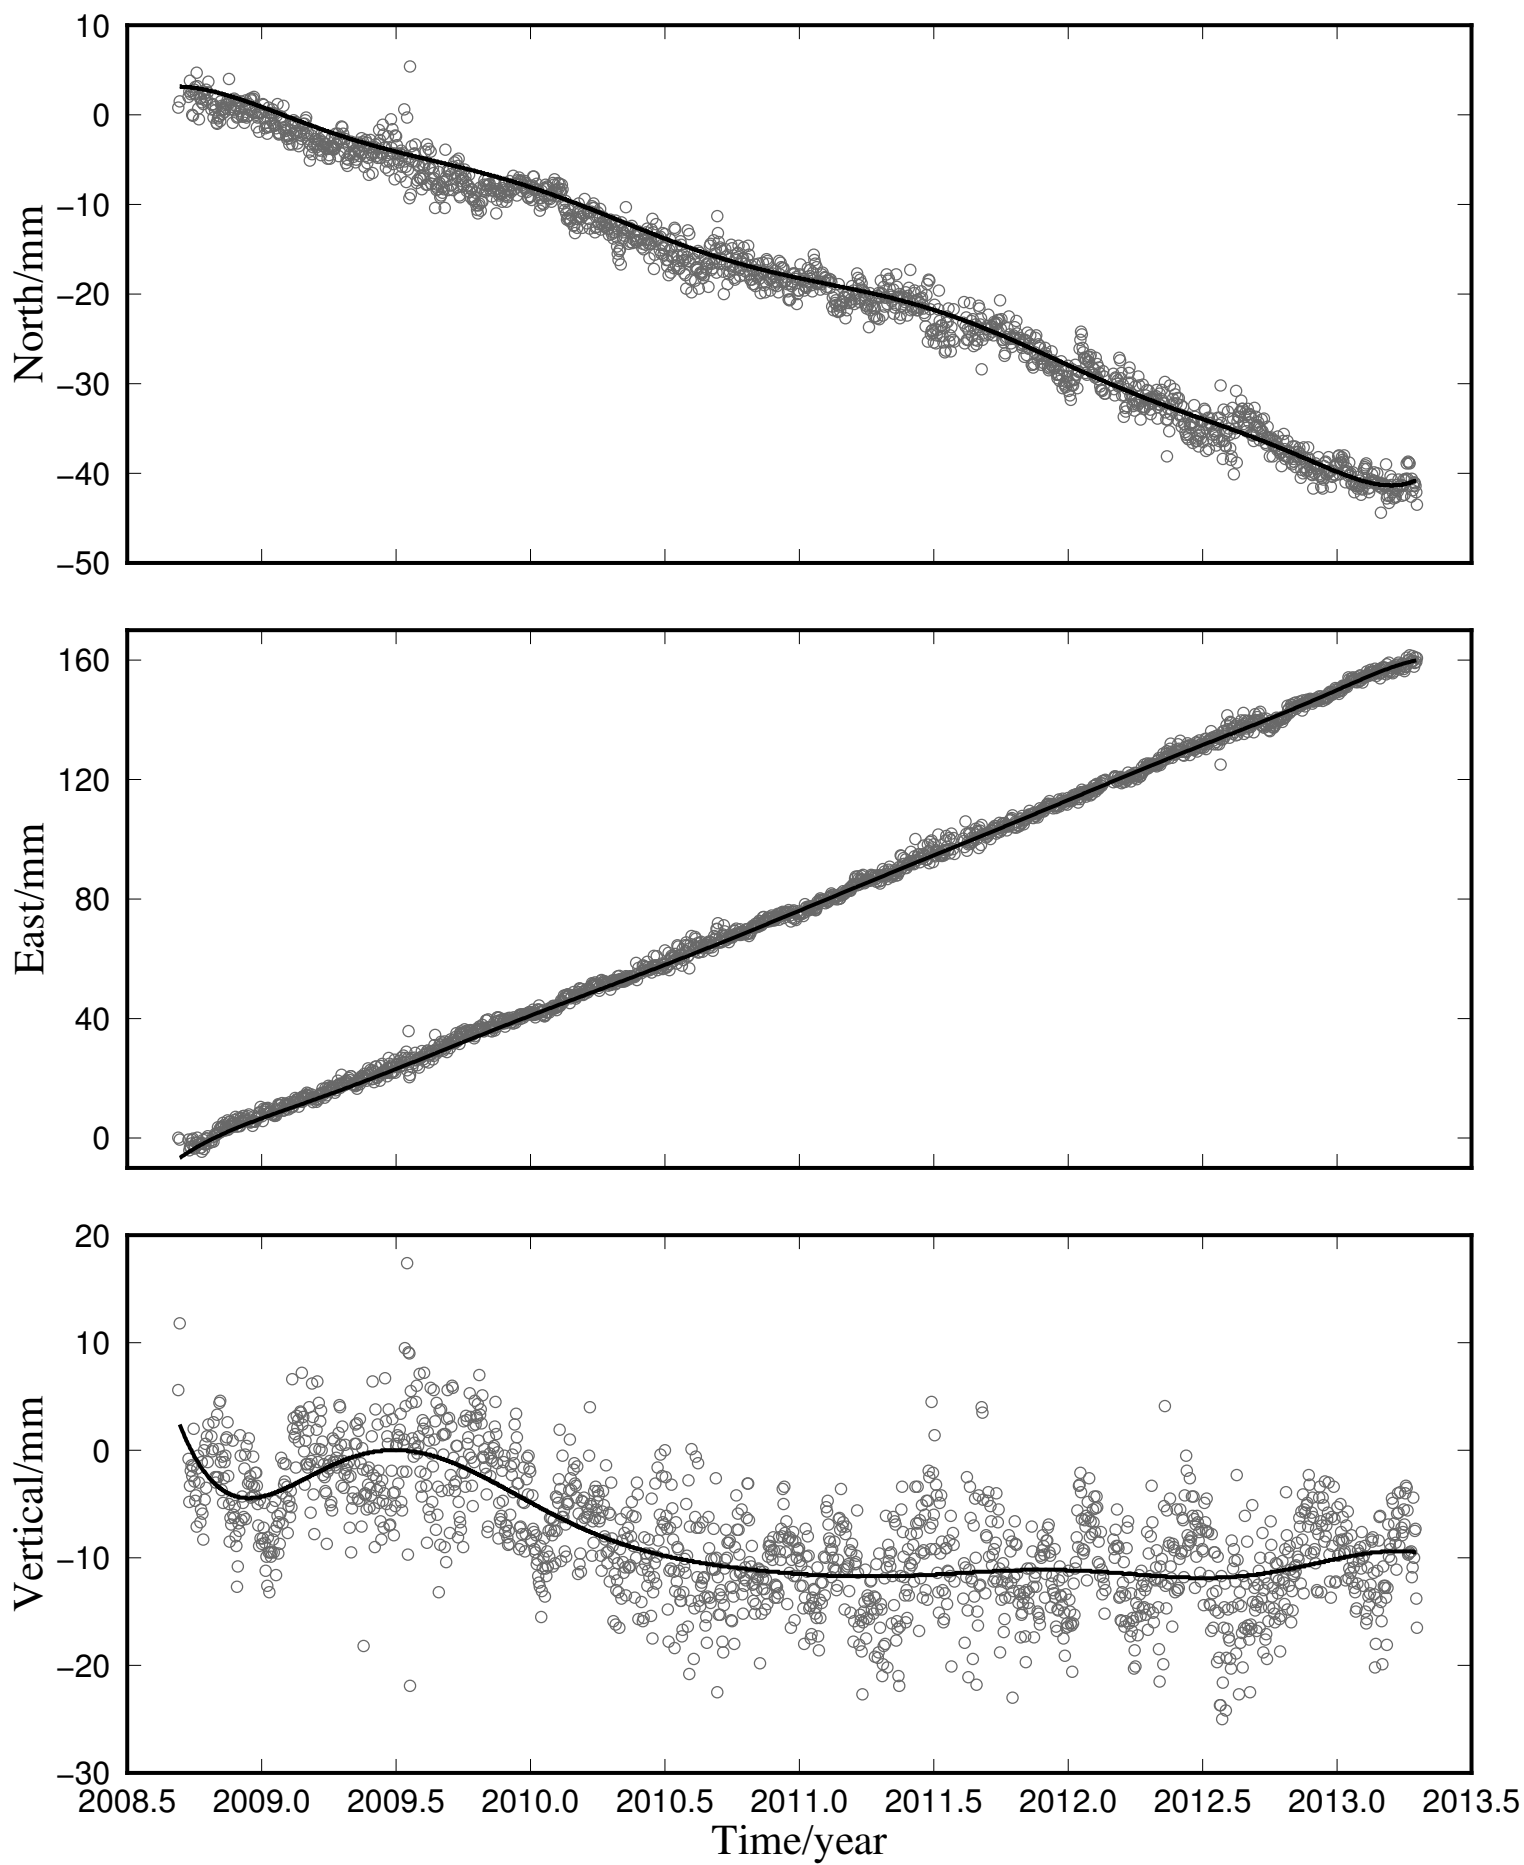

Supplement: s1 [file s1]

LS03\_GPS

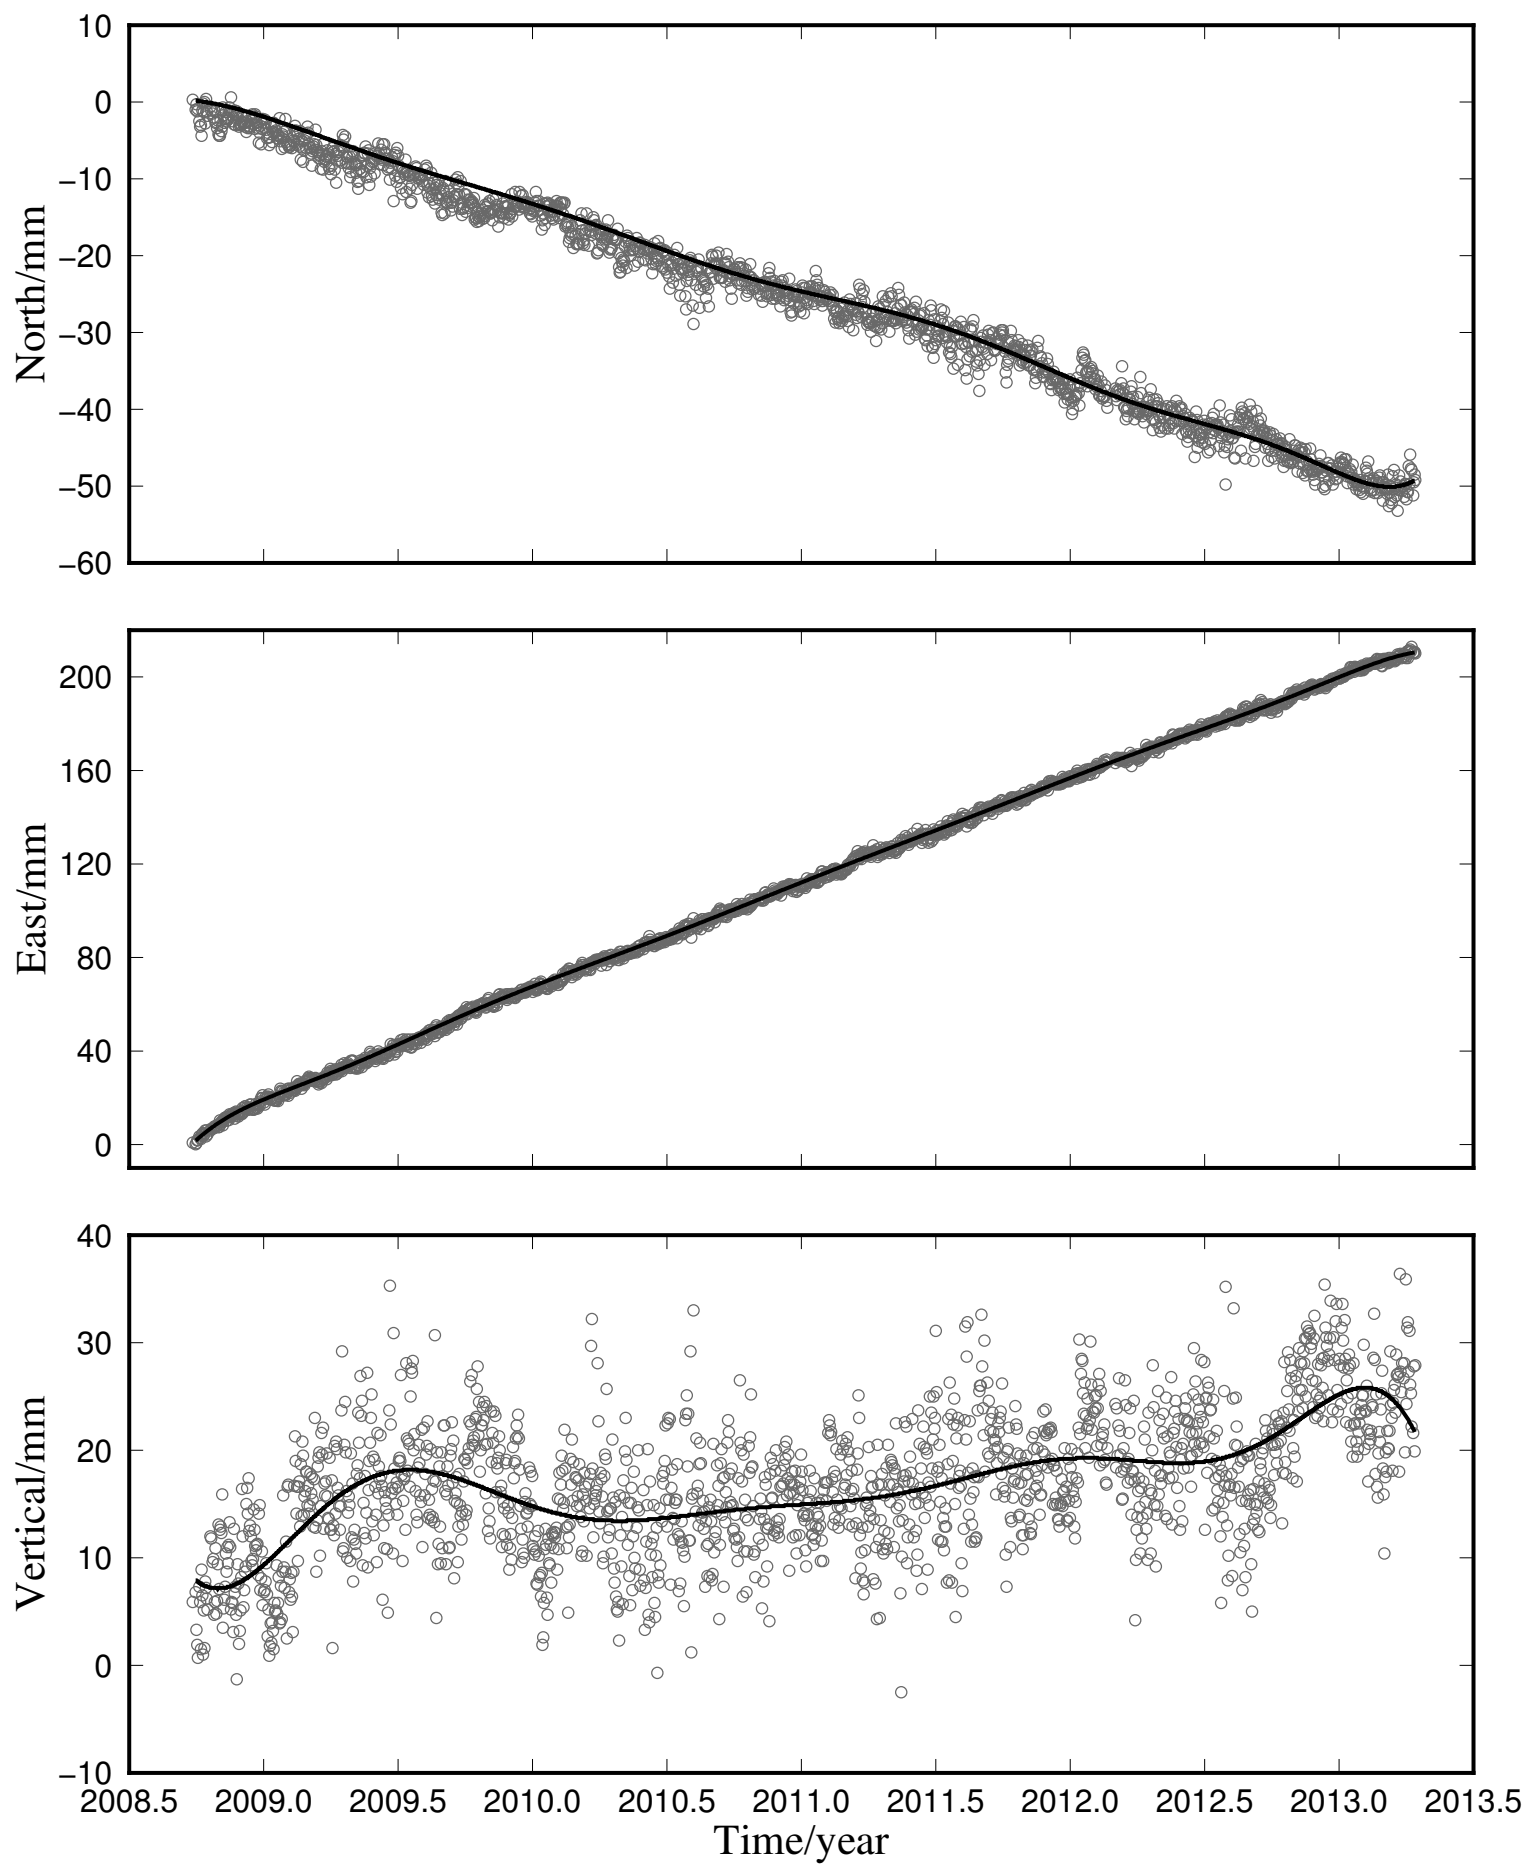

Supplement: s1 [file s1]

LS06\_GPS

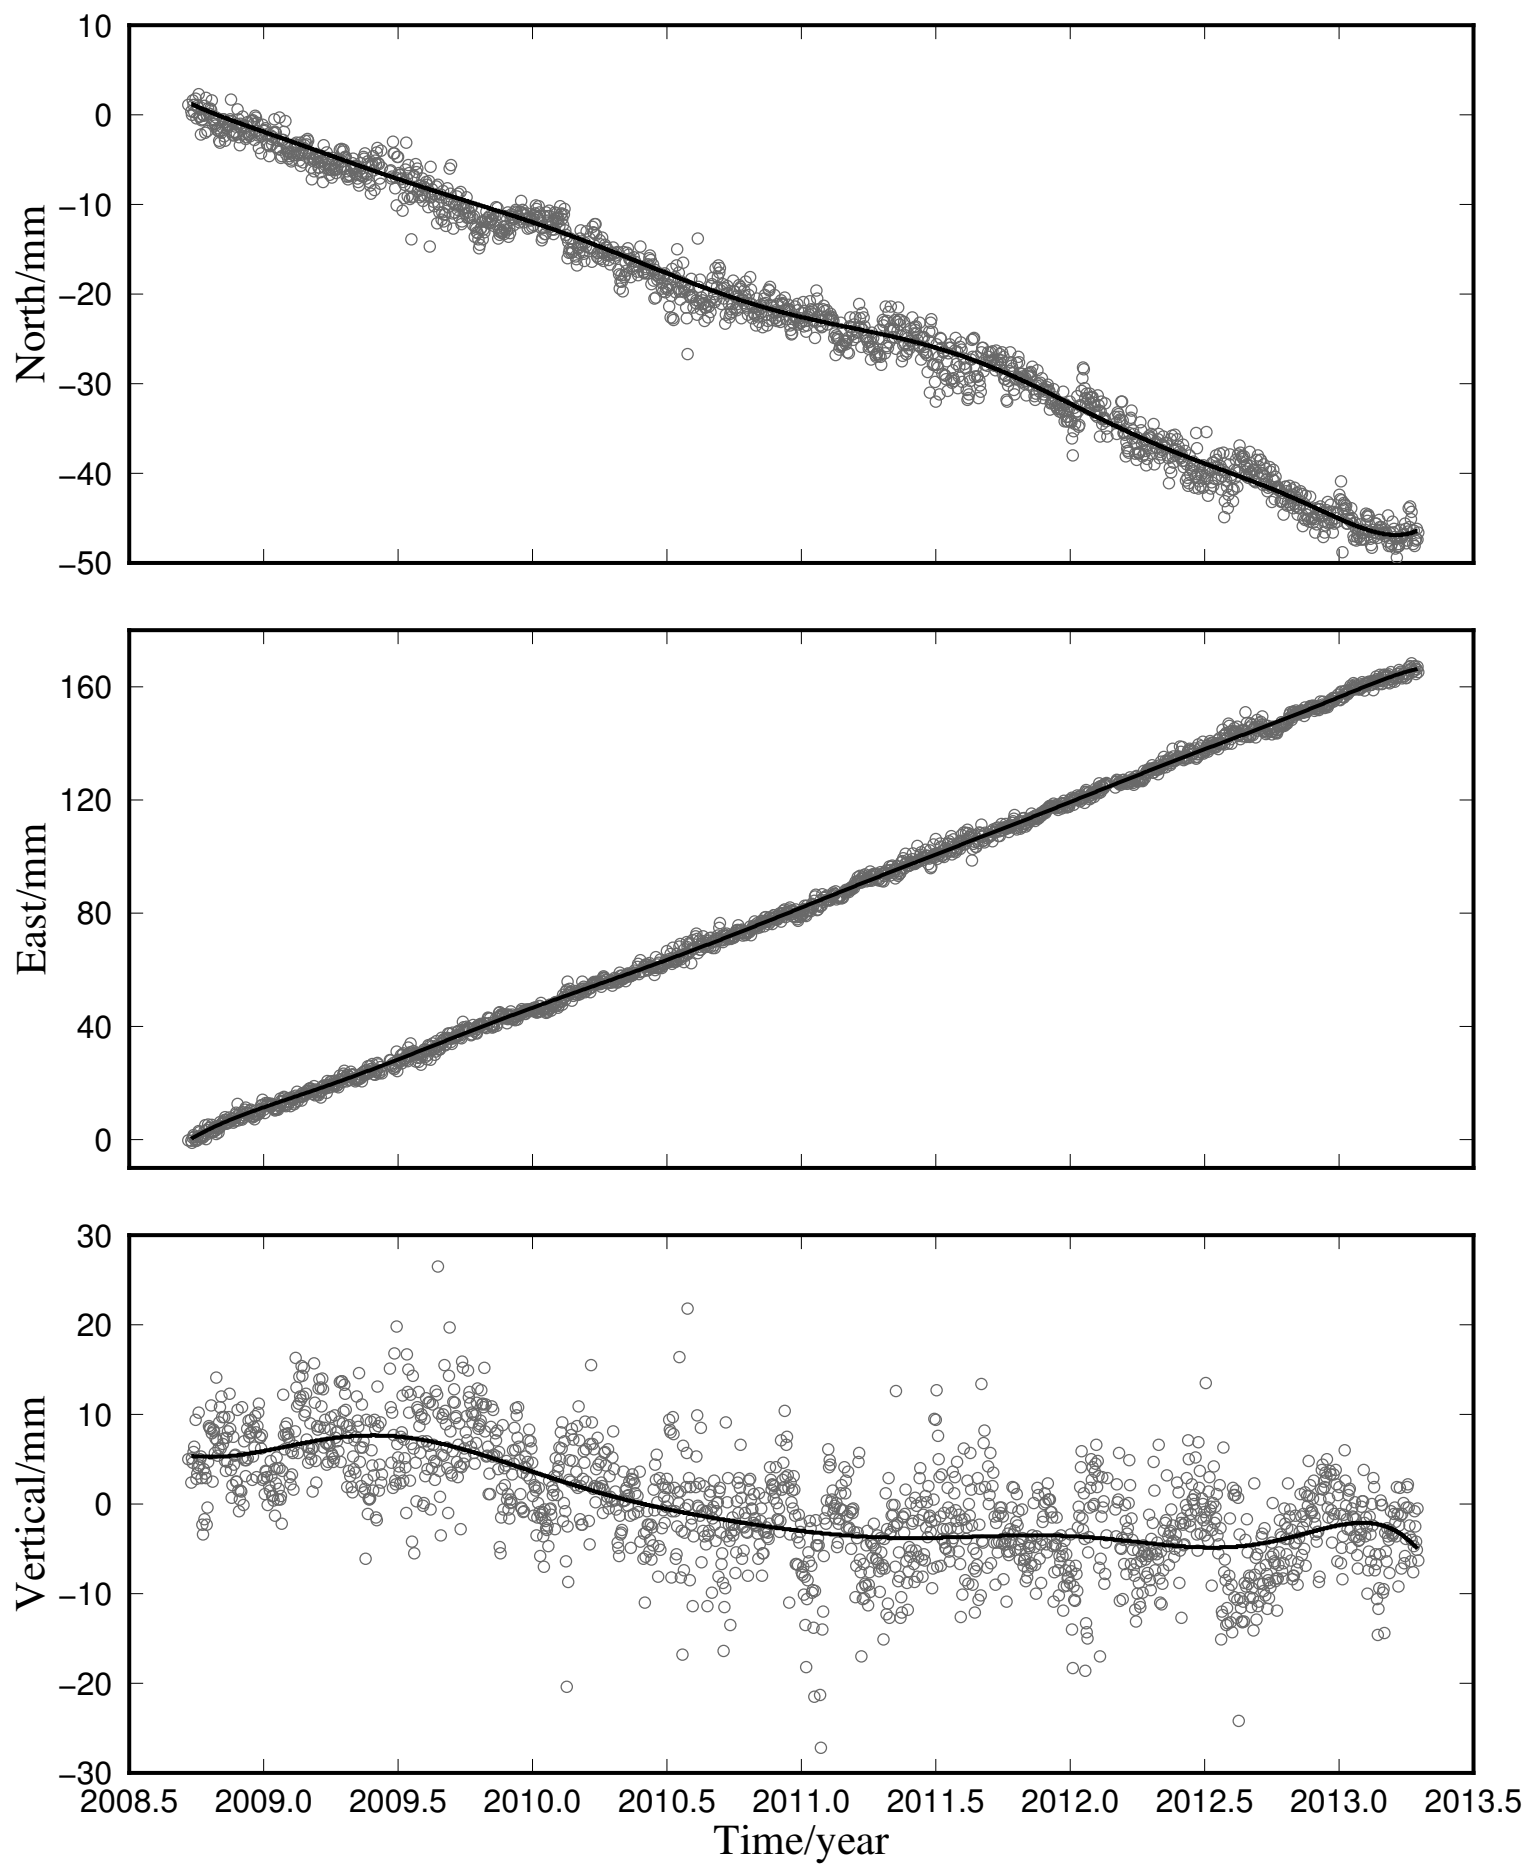

Supplement: s1 [file s1]

LS02\_GPS

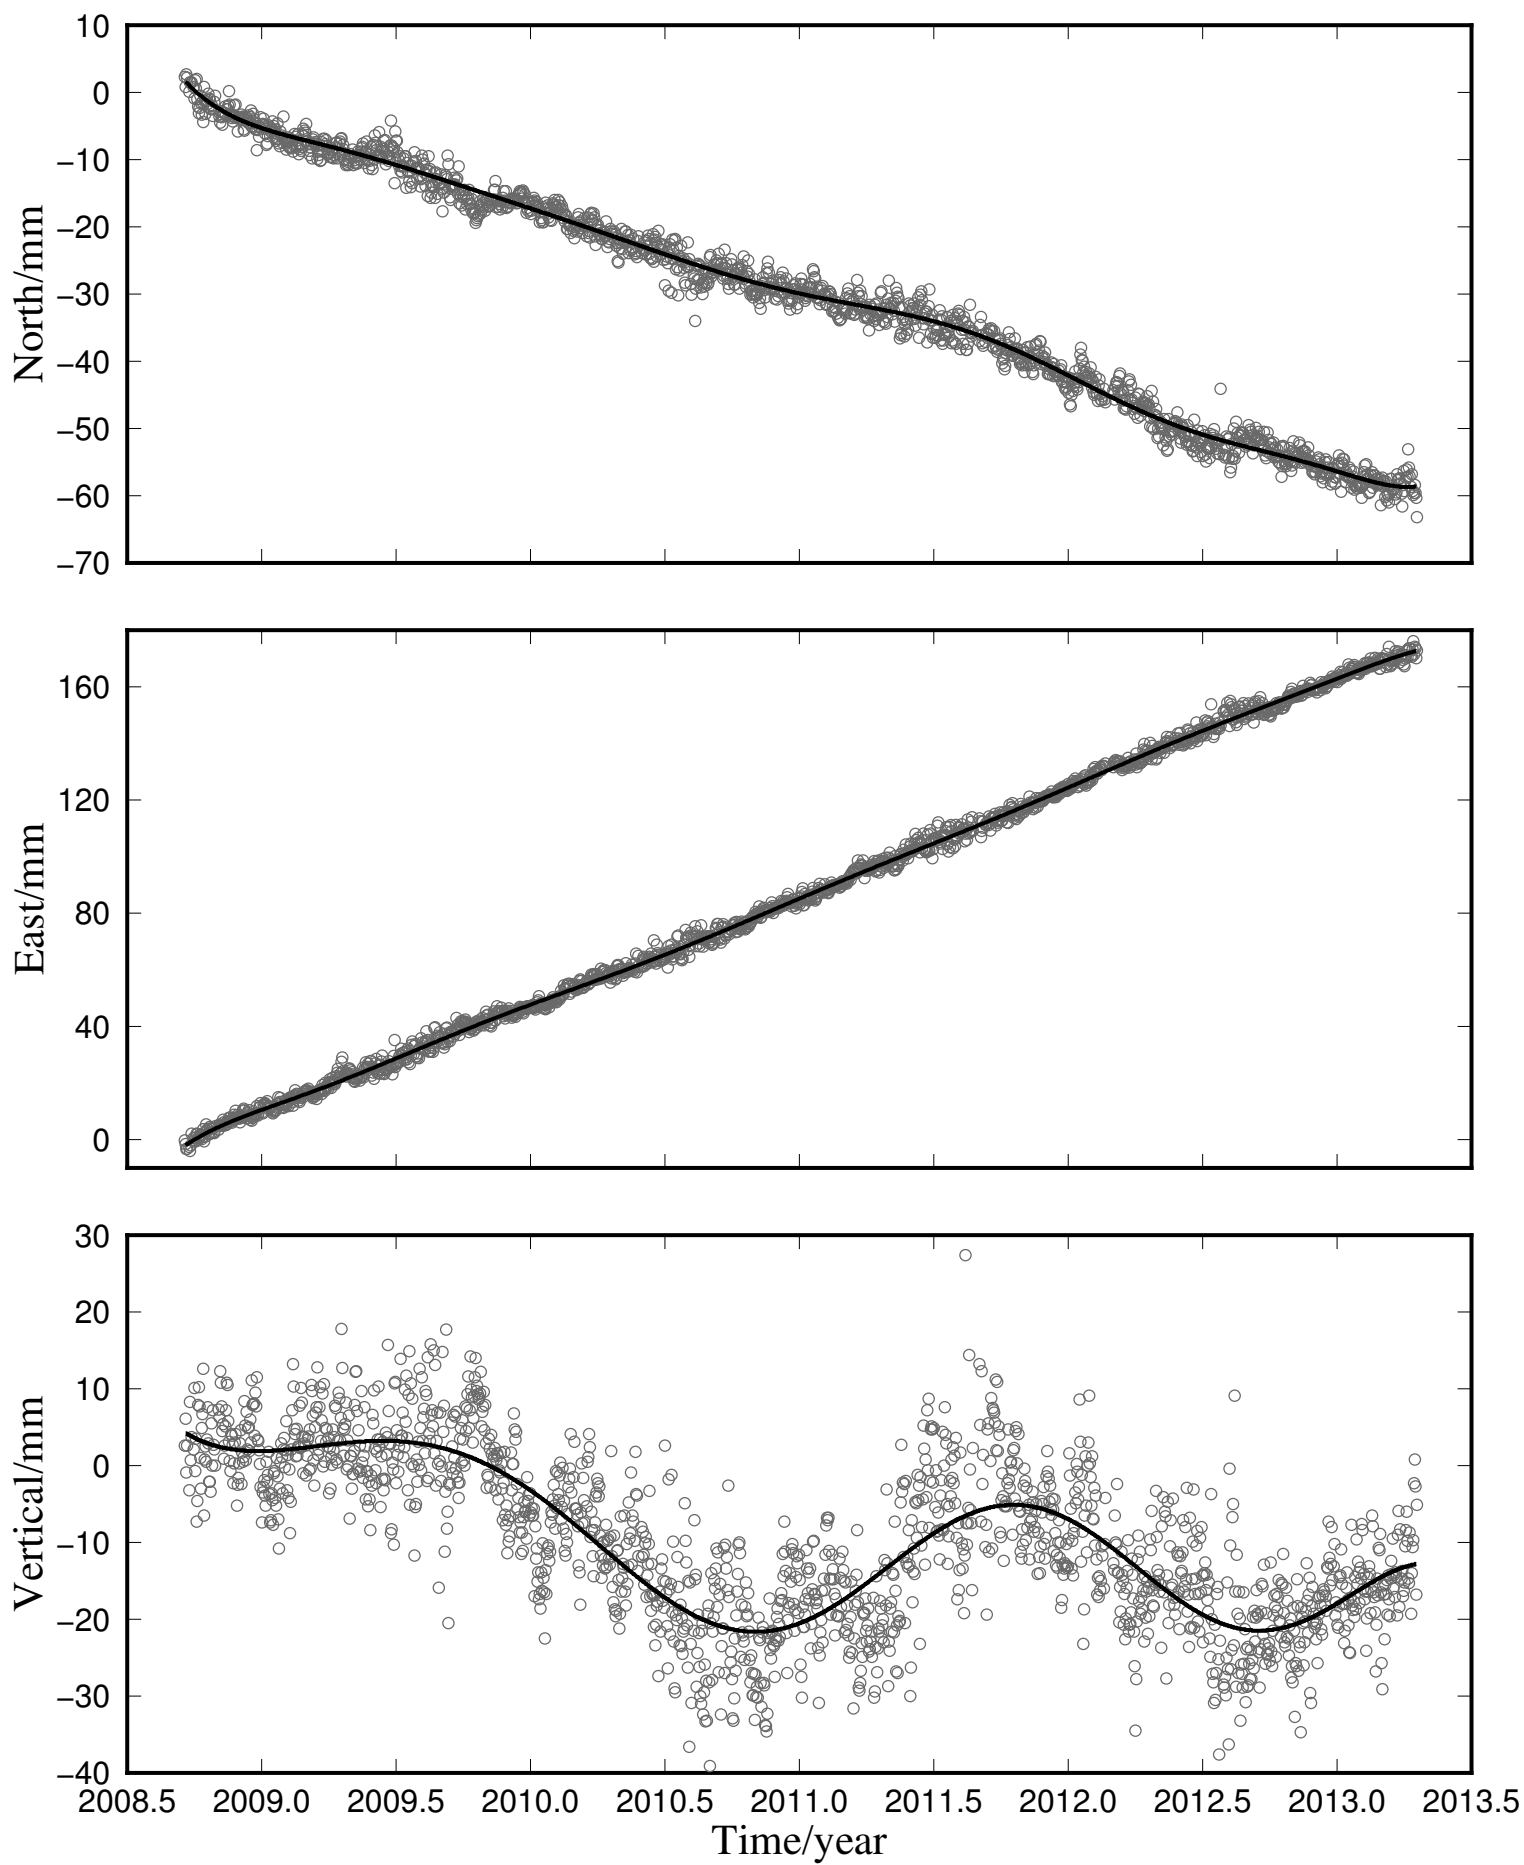

Supplement: s1 [file s1]

LS01\_GPS

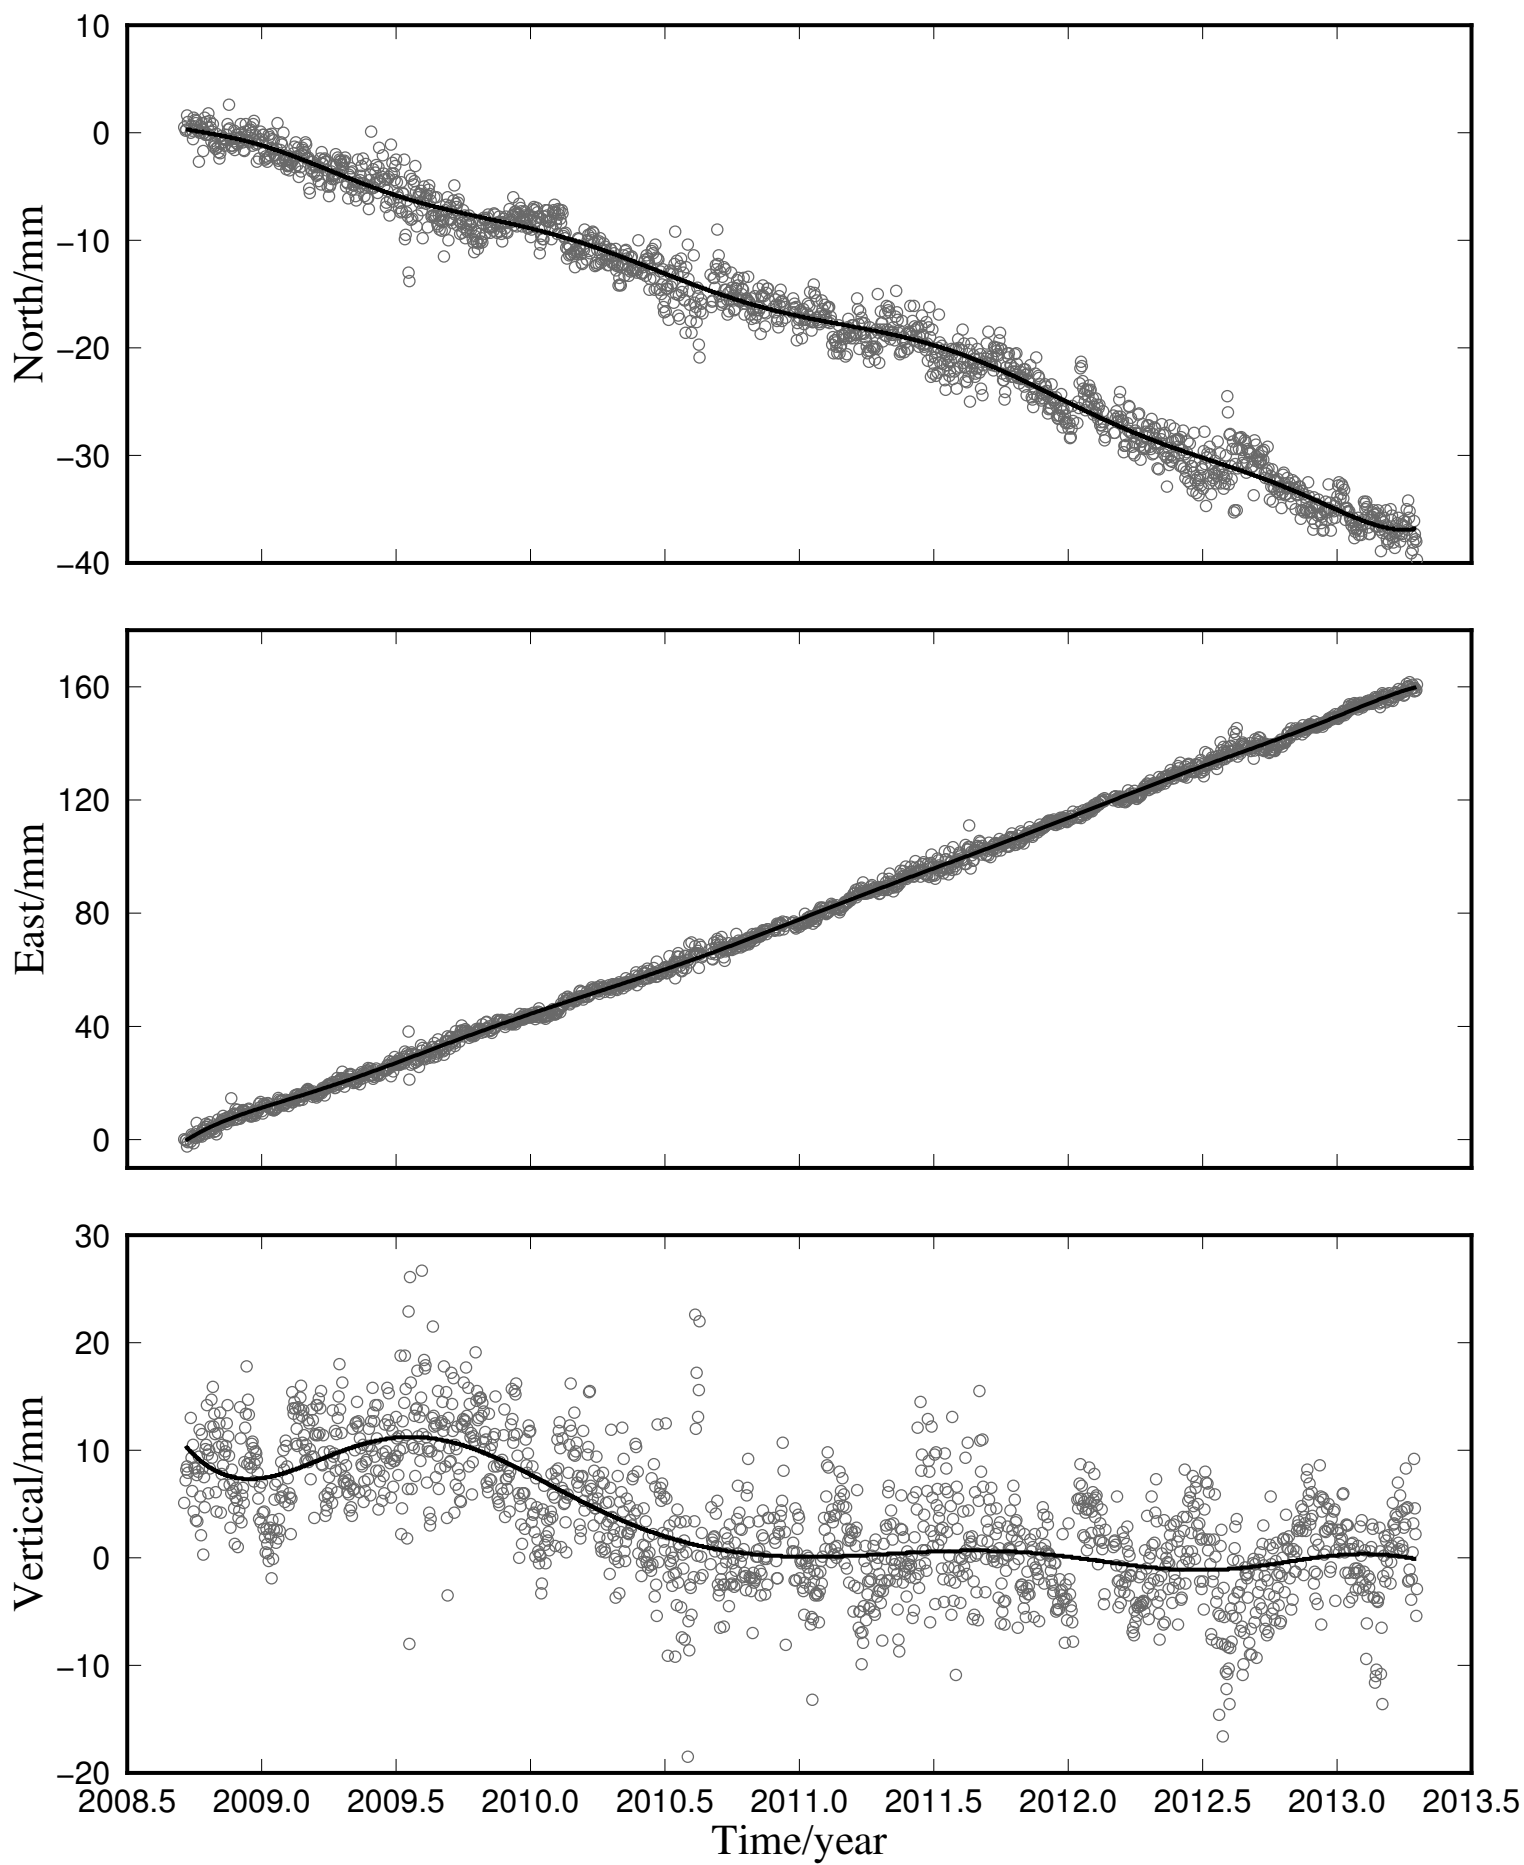

Supplement: s1 [file s1]

LS04\_GPS

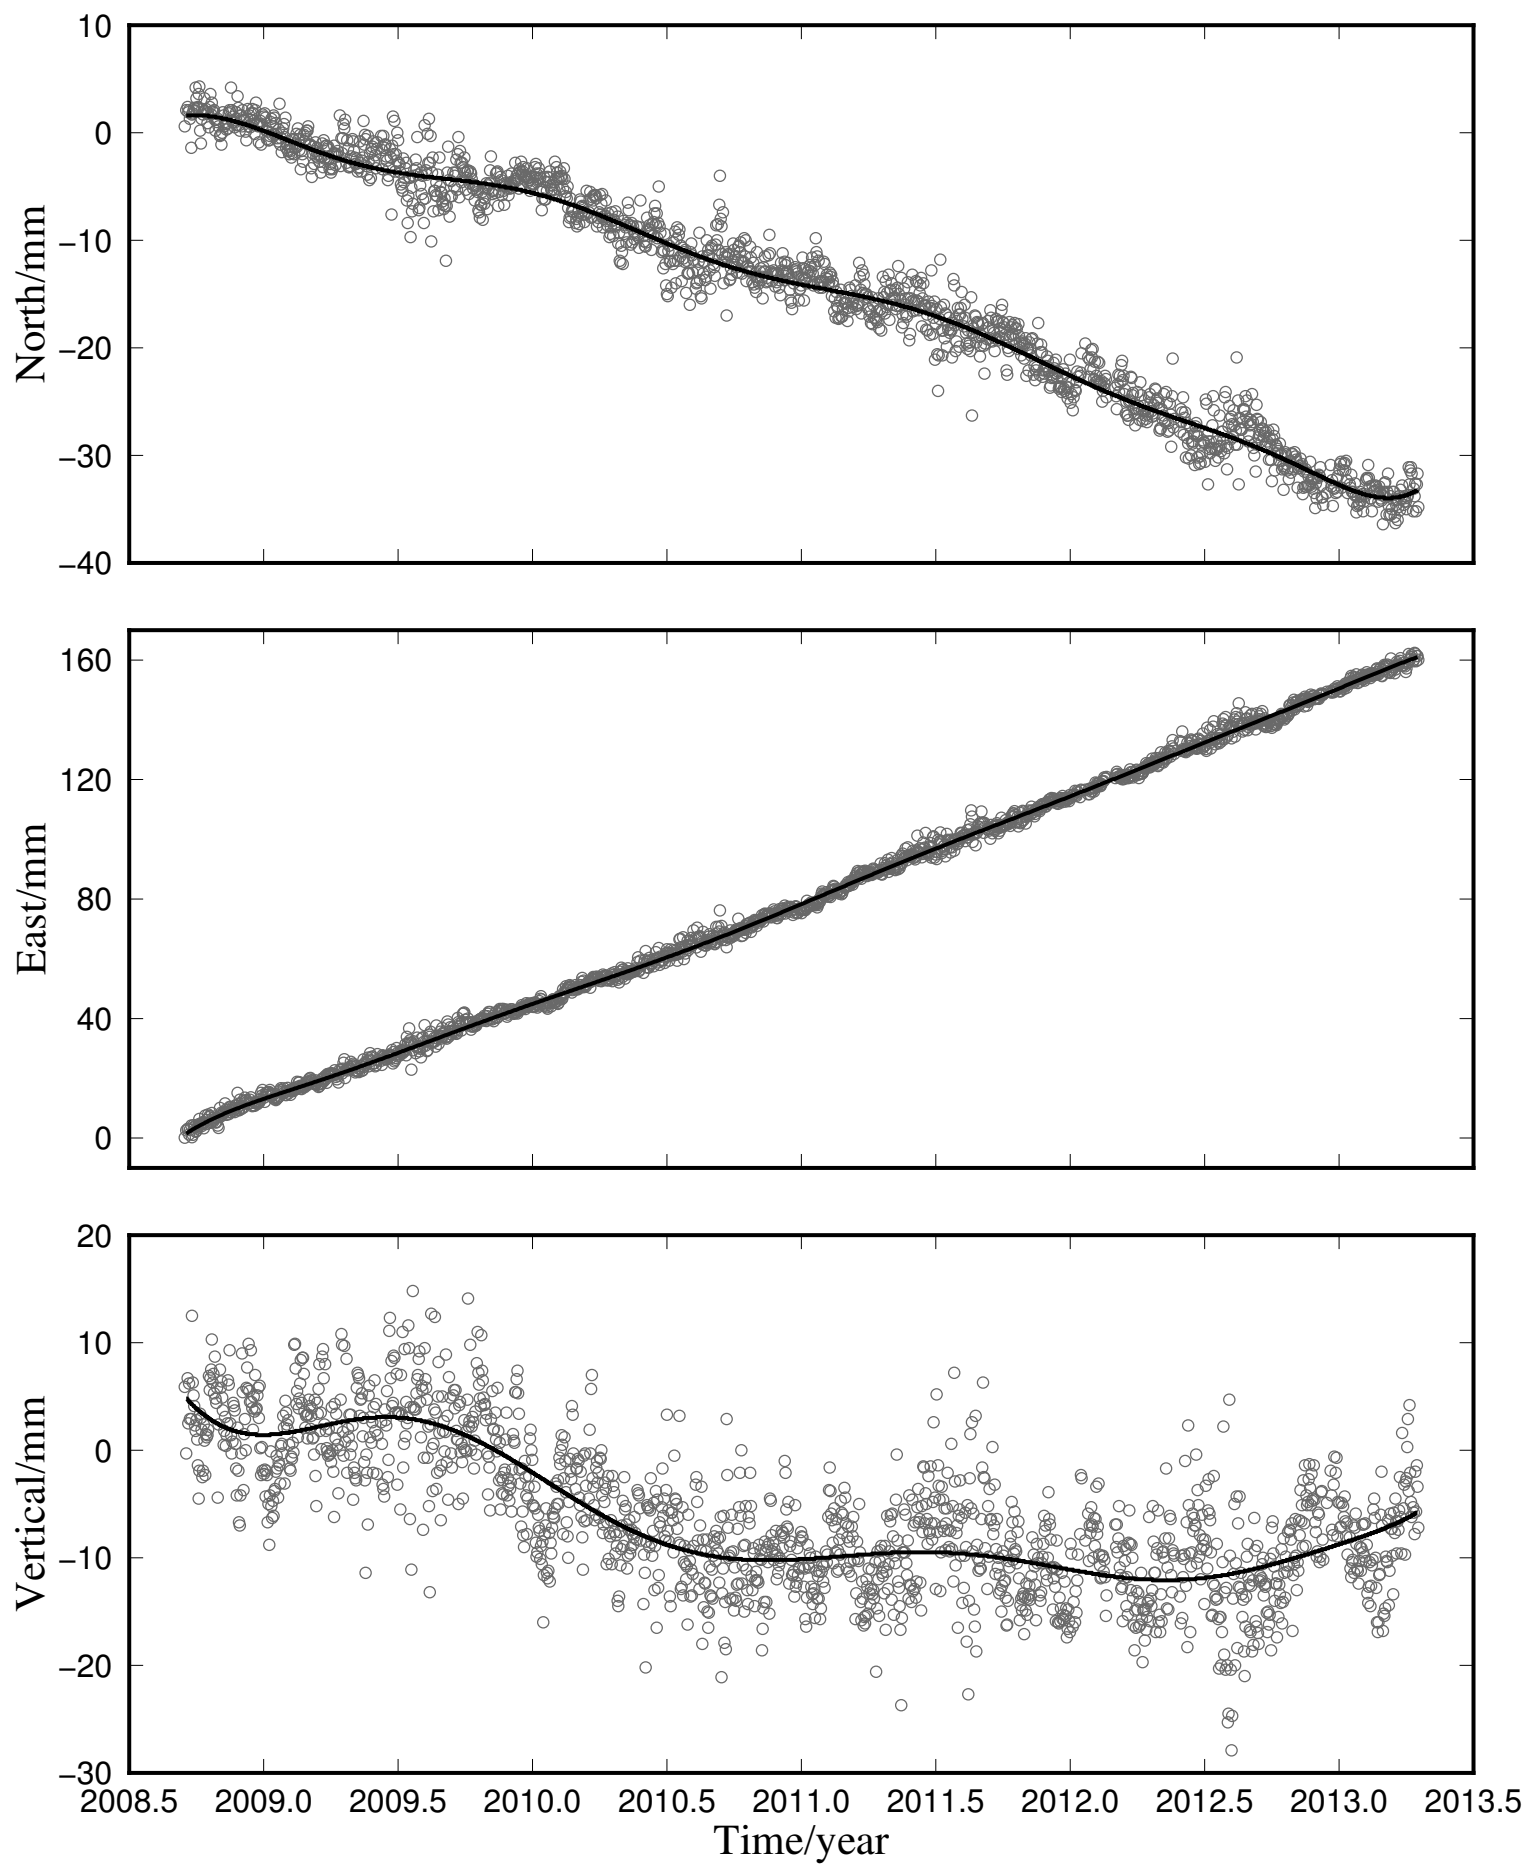

Supplement: s1 [file s1]
